# Supplementary material for: An Efficient Zr-ZSM-5-st Solid Acid Catalyst for the Polyol Esterification Reaction
Source: MDPI journal article supplement (doi:10.3390/catal12080901), 2022-08-16
Supplement: s1 [file s1]

## 1. Characterization of the catalysts

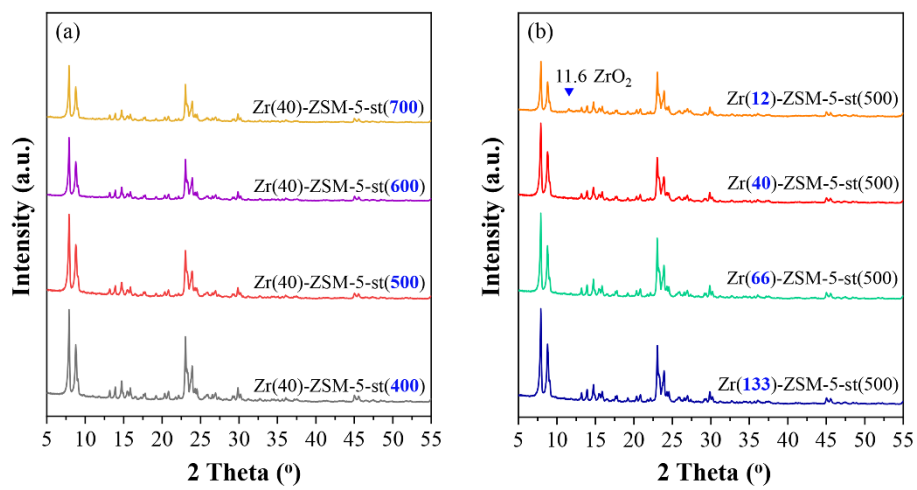

**Figure S1.** XRD patterns of Zr(40)-ZSM-5-st treated at 400-700°C(a) and Zr-ZSM-5-st(500) with Si/Zr mole ratio of 12-133(b).

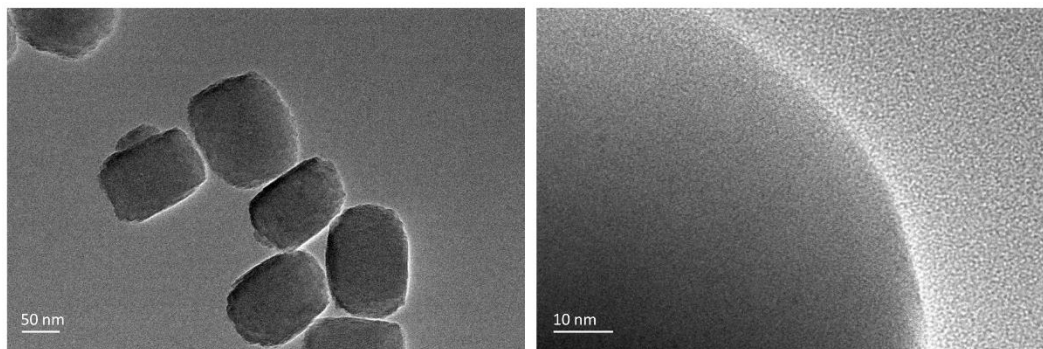

**Figure S2.** TEM images of ZSM-5 zeolite.

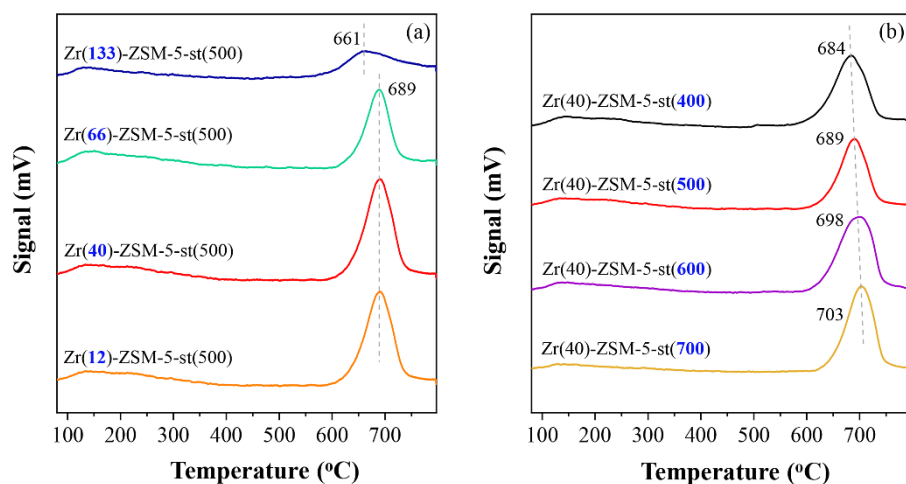

**Figure S3.** NH<sub>3</sub>-TPD spectra of Zr(40)-ZSM-5-st treated at 400-700°C(a) and Zr-ZSM-5-st(500) with Si/Zr mole ratio of 12-133(b).

**Table S1.** Surface area and pore volume distribution of ZSM-5, Zr-ZSM-5 and a series of Zr-ZSM-5-st catalysts.

| Sample                             | S <sub>BET</sub> <sup>a</sup><br>(m <sup>2</sup> /g) | V <sub>total</sub> <sup>b</sup><br>(cm <sup>3</sup> /g) | V <sub>micro</sub> <sup>c</sup><br>(cm <sup>3</sup> /g) | V <sub>meso</sub> <sup>d</sup><br>(cm <sup>3</sup> /g) |
|------------------------------------|------------------------------------------------------|---------------------------------------------------------|---------------------------------------------------------|--------------------------------------------------------|
| ZSM-5                              | 325.923                                              | 0.326                                                   | 0.120                                                   | 0.206                                                  |
| Zr(40 <sup>d</sup> )-ZSM-5         | 325.329                                              | 0.324                                                   | 0.117                                                   | 0.207                                                  |
| Zr(40)-ZSM-5-st(400 <sup>e</sup> ) | 339.067                                              | 0.337                                                   | 0.094                                                   | 0.243                                                  |
| Zr(40)-ZSM-5-st(500)               | 383.716                                              | 0.370                                                   | 0.085                                                   | 0.285                                                  |
| Zr(40)-ZSM-5-st(600)               | 353.321                                              | 0.338                                                   | 0.072                                                   | 0.266                                                  |
| Zr(40)-ZSM-5-st(700)               | 325.208                                              | 0.304                                                   | 0.061                                                   | 0.243                                                  |

<sup>a</sup>S<sub>BET</sub> is estimated by the BET method.

<sup>b</sup>V<sub>total</sub> (total volume) is calculated by the BJH adsorption method.

<sup>c</sup>V<sub>micro</sub> (micropore volume) is calculated by t-plot method.

<sup>d</sup>V<sub>meso</sub> (mesopore volume) = V<sub>total</sub> - V<sub>micro</sub>.
